# Supplementary material for: The Epibiotic Microbiota of Wild Caribbean Sea Urchin Spines Is Species Specific
Source: MDPI journal article supplement (doi:10.3390/microorganisms11020391), 2023-02-03
Supplement: s1 [file s1]

**Table S1.** Local water physicochemical conditions at three sites of the northeastern coast in Puerto Rico.

| Sites/Parameters | Temp (°C)    | Salinity (o/oo) | pH          |
|------------------|--------------|-----------------|-------------|
| Cerro Gordo (CG) | 25.6 ± 0.00  | 33.32 ± 0.04    | 8.45 ± 0.05 |
| Cataño (IC)      | 26.08 ± 0.08 | 33.56 ± 0.05    | 8.41 ± 0.08 |
| Luquillo (MA)    | 26.76 ± 0.07 | 33.8 ± 0.16     | 8.32 ± 0.05 |
